# Supplementary material for: Distinct amino acid–sensing mTOR pathways regulate skeletal myogenesis
Source: PubMed Central journal article supplement — Mol Biol Cell. 2013 Dec 1;24(23):3754–63. doi: 10.1091/mbc.E13-06-0353 (PMC3843001; doi:10.1091/mbc.e13-06-0353), 2013-12-01
Supplement: supp_E13-06-0353_CombinedSupMats.pdf [file supp_E13-06-0353_CombinedSupMats.pdf]

# Supplemental Materials

*Molecular Biology of the Cell*

Yoon et al.

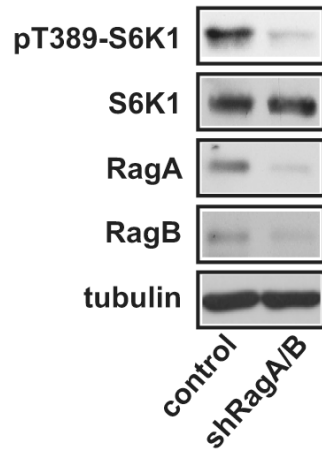

**Figure S1. Rag regulates mTORC1 in C2C12 myoblasts.** C2C12 cells expressing lentivirus-delivered shRNAs for RagA and RagB were serum starved overnight and subjected to amino acid withdrawal for 2 hrs, followed by amino acid stimulation for 30 min. The cell lysates were analyzed by Western blotting.

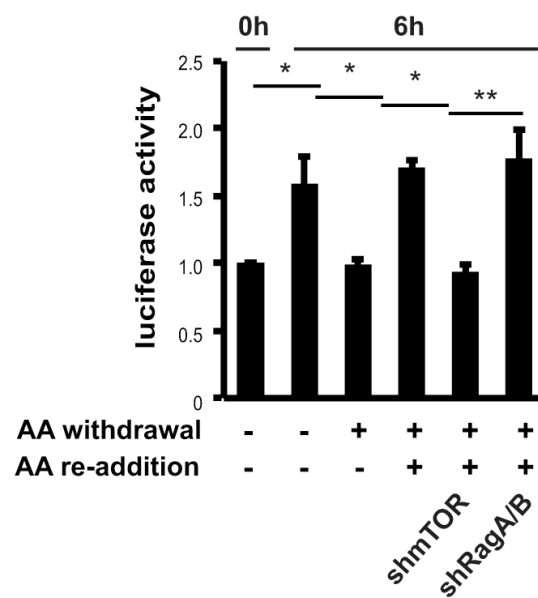

**Figure S2. Rag is not involved in the regulation of Igf2 ME during myogenic differentiation.** C2C12 cells stably expressing the H19-luc-ME reporter were infected with lentiviruses expressing shRNAs as indicated, selected with puromycin for 3 days, and then induced to differentiate for 6 hrs in the presence or absence of amino acids, followed by luciferase assays. Data shown are mean  $\pm$  SD of 3 independent experiments. One-sample or paired *t* test was performed to compare the indicated pairs of data. \* $P$ <0.05; \*\* $P$ <0.01.
